# Supplementary material
Source: PubMed Central journal article supplement (PMC4590346)
Supplement: bi501313k_si_001.pdf [file bi501313k_si_001.pdf]

# Substrate Pathways in the Nitrogenase MoFe Protein by Experimental Identification of Small Molecule Binding Sites

*Christine N. Morrison,<sup>1</sup> Julie A. Hoy,<sup>1</sup> Limei Zhang,<sup>1</sup> Oliver Einsle,<sup>2</sup> Douglas C. Rees<sup>1,3\*</sup>*

<sup>1</sup> California Institute of Technology, Division of Chemistry and Chemical Engineering 114-96, Pasadena CA 91125, USA.

<sup>2</sup> Institut für Organische Chemie und Biochemie, Albert-Ludwigs-Universität Freiburg, 79104 Freiburg, Germany. BIOSS Centre for Biological Signaling Studies, Albert-Ludwigs-Universität Freiburg, 79104 Freiburg, Germany.

<sup>3</sup> Howard Hughes Medical Institute, California Institute of Technology, Pasadena, CA 91125, USA.

## Movie

In this movie, the MoFe protein is rotated to show the location of all pathways discussed in the manuscript, including newly identified and previously published pathways (blue: AI/IS pathway; magenta: AII pathway; forest green: BI pathway; green: CI pathway; orange: DI pathway/interstitial water channel; brown: center water channel; yellow: ammonia egress pathway; red: molecular dynamics pathway). The  $\alpha$  subunits of the protein are shown as green and magenta ribbon, and the  $\beta$  subunits are shown in cyan and yellow ribbon. One FeMo-cofactor and P-cluster are shown as ball and sticks colored by element (yellow: sulfur; orange: iron; cyan: molybdenum; red: oxygen; grey: carbon). The two black Fe atoms in the FeMo-cofactor are Fe2 and Fe6, which bind the reversible inhibitor, carbon monoxide, in a bridging fashion. The three large black spheres are Xe binding sites in Av1 and Cp1. For clarity, the pathways, cofactors, and Xe binding sites are only displayed in one  $\alpha\beta$ .

**Table S1.** RMSD of MoFe Protein Xe Binding Pockets Compared to Native Structures

|                               | Av1-Xe structure compared to Av1 (1.0 Å, 3U7Q) | Cp1-Xe structure compared to Cp1 (1.08 Å, 4WES) |
|-------------------------------|------------------------------------------------|-------------------------------------------------|
| RMSD of whole protein (Å)     | 0.192                                          | 0.215                                           |
| RMSD of Xe1 binding site (Å)* | 0.153                                          | 0.210                                           |
| RMSD of Xe2 binding site (Å)* | 0.151                                          | 0.232                                           |
| RMSD of Xe3 binding site (Å)* | 0.119                                          | 0.211                                           |

\* Residues within 6 Å of the Xe site were used in the RMSD calculations.

**Table S2.** Small Molecules and Ions in Published MoFe Protein Structures

| Protein (resolution) | PDB ID                  | Small molecule (total number observed) | Binding location |
|----------------------|-------------------------|----------------------------------------|------------------|
| Av1 (1.0 Å)          | 3U7Q <sup>1</sup>       | IMD (4)                                | Surface          |
|                      |                         | Mg <sup>2+</sup> (2)                   | Surface          |
|                      |                         | IMD                                    | Interior         |
| Av1 (1.5 Å)          | 4TKV <sup>2</sup>       | CO (3)                                 | Surface          |
|                      |                         |                                        | Interior (2)     |
|                      |                         | S                                      | Interior         |
| Cp1 (1.08 Å)         | 4WES <sup>3</sup>       | MPD                                    | Surface          |
| Kp1 (1.60 Å)         | 1QGU, 1QH8 <sup>4</sup> | Mg <sup>2+</sup> (5)                   | Surface          |
|                      |                         | EDO (14)                               | Surface          |
|                      |                         | EDO                                    | Surface          |
|                      |                         | EDO                                    | Interior         |

**Table S3.** Residues Involved in Proposed Pathways from Previous and Current Studies

| Pathway target             | Pathway                                     | Residues lining pathway (Av1 numbering)                                                                                                                            |                                                                                                                                                                                                 |
|----------------------------|---------------------------------------------|--------------------------------------------------------------------------------------------------------------------------------------------------------------------|-------------------------------------------------------------------------------------------------------------------------------------------------------------------------------------------------|
| FeMo-cofactor              | AI                                          | $\alpha$                                                                                                                                                           | Val70, Val71, Trp72, Ile75, His195, His196, Asn199, Asp200, Val202, Arg203, Tyr229, Trp253, Ser254, Cys275, Ser278, Met279, Tyr281, Ile282                                                      |
|                            | AII                                         | $\alpha$                                                                                                                                                           | Ile59, Tyr354, Ile355, Glu380, Gly422, Ser423, Gly424, Lys426, Glu427, Arg439, Glu440, Met441, His442, Asp445, Ser447, Tyr450, Phe459, Asp462, Met463                                           |
|                            |                                             | $\beta'$                                                                                                                                                           | Thr360                                                                                                                                                                                          |
|                            | BI                                          | $\alpha$                                                                                                                                                           | Ala65, Gly66, Gly69, Val70, Gln90, Tyr91, Ser92, Arg93, Ala94, Gly95, Arg96, Gln191, His195                                                                                                     |
| $\beta$                    |                                             | Ala67, Lys68, Ala69, Leu67, Tyr102, Arg105, His106, Phe107, His193, Phe230, Thr232, Gly368, Asp369, Phe372, Asn445, Tyr447, Gly470, Phe471, Pro472, Phe474, Thr484 |                                                                                                                                                                                                 |
| P-cluster                  | CI                                          | $\alpha$                                                                                                                                                           | Gly61, Cys62, Tyr64, Ala65, Gln90, Tyr91, Ser92                                                                                                                                                 |
|                            |                                             | $\beta$                                                                                                                                                            | Ala67, Lys68, Ala69, Leu77, Gly94, Ala97, Tyr98, Ser100, Tyr102, Arg105, His106, Phe107, His193, Phe230, Glu231, Gly368, Asp369, Phe372, Asn445, Tyr447, Gly470, Phe471, Pro472, Phe474, Thr484 |
| FeMo-cofactor              | Interstitial water channel <sup>5</sup> /DI | $\alpha$                                                                                                                                                           | Lys68, Gly69, Gly73, Ser92, Arg93, Ala94, Gly95, Arg96, Arg97, Asn98, Tyr99, Tyr100, Ile101, Thr104, Val110, Thr111, Ile231, His442, Ser443, Tyr446                                             |
|                            |                                             | $\beta$                                                                                                                                                            | Leu16, Lys21, Leu24, Arg28, Tyr98, Arg105, Phe450, Arg453                                                                                                                                       |
|                            |                                             | $\beta'$                                                                                                                                                           | Gln513, Ala514, Asp516, Tyr517, Asn518, His519, Asp520, Leu521, Val522                                                                                                                          |
|                            | IS                                          | $\alpha$                                                                                                                                                           | Val70, Val71, Trp72, Ile75, Met78, Arg96, Val179, His195, Val202, Trp205, Lys209, Tyr229, Trp253, Ile262, Glu263, Met279                                                                        |
|                            | NH <sub>3</sub> egress <sup>6</sup>         | $\alpha$                                                                                                                                                           | Gln53, Met57, Thr58, Ile59, Arg60, Ala65, Gln191, Glu380, Asp403, Lys426                                                                                                                        |
|                            |                                             | $\beta$                                                                                                                                                            | Gln93, Gly94, Ser115, Ser117                                                                                                                                                                    |
| MD simulation <sup>7</sup> | $\alpha$                                    | Asn49, Gly66, Val70, Ser190, Gln191, Ser192, Leu193, His195, His196, Asn199, Arg277, Ser278, Met279, Asn280, Tyr281, Gly357, Phe381, Ala382, His383                |                                                                                                                                                                                                 |

**Table S4.** IMD, CO, S, and EDO Binding Sites in Av1 and Kp1

| Crystal (PDB ID) | Site | Displaced species in native protein | Occupancy (%) | Distance* to (Å) |         |
|------------------|------|-------------------------------------|---------------|------------------|---------|
|                  |      |                                     |               | FeMo-cofactor    | surface |
| Av1 (3U7Q)       | IMD  | HOH                                 | 100           | 11.5             | 11.6    |
| Av1 (4TKV)       | CO   | HOH                                 | 60%           | 17.0             | 8.7     |
| Av1 (4TKV)       | S    | Empty pocket                        | 100%          | 19.0             | 10.9    |
| Kp1 (1QGU)       | EDO  | HOH                                 | 100           | 11.6             | 10.1    |

\* Distances were measured from the closest substrate atom to the closest metal in the FeMo-cofactor or to the closest non-solvent atom on the protein surface.

**Table S5.** Conservation of Specific Residues and Residue Type in Av1 and Cp1

| Residue conservation                                      | Native protein |                      |                  | Xe/PRL binding pockets and AI, AII, BI, CI pathways |
|-----------------------------------------------------------|----------------|----------------------|------------------|-----------------------------------------------------|
|                                                           | All residues   | Non-surface residues | Surface residues |                                                     |
| Conservation of specific residue                          | 38.0%          | 38.4%                | 24.8%            | 62.5%                                               |
| Conservation of residue type (hydrophobic or hydrophilic) | 73.7%          | 63.4%                | 53.2%            | 85.6%                                               |

**Table S6.** Close Contacts and Residue Conservation for Av1-Xe1 (Protein Interior)

|                                       | <b>Residue</b>   | <b>Atom</b> | <b>Distance from Xe (Å)</b> | <b>Corresponding residue in Cp1</b> |
|---------------------------------------|------------------|-------------|-----------------------------|-------------------------------------|
| 1                                     | $\alpha$ -Val71  | CG1         | 3.88                        | $\alpha$ -Val60                     |
| 2                                     | $\alpha$ -Trp72  | CE3         | 4.48                        | $\alpha$ -Met61                     |
| 3                                     | $\alpha$ -Ile75  | CD1         | 3.29                        | $\alpha$ -Ile64                     |
| 4                                     | $\alpha$ -Ala198 | O           | 5.95                        | $\alpha$ -Ala187                    |
| 5                                     | $\alpha$ -Val202 | CG2         | 3.59                        | $\alpha$ -Val191                    |
| 6                                     | $\alpha$ -Trp253 | CE3         | 4.34                        | $\alpha$ -Leu238                    |
| 7                                     | $\alpha$ -Ser254 | CB          | 4.31                        | $\alpha$ -Thr239                    |
| 8                                     | $\alpha$ -Ile262 | CD1         | 4.59                        | $\alpha$ -Val247                    |
| 9                                     | $\alpha$ -Met279 | CE          | 4.49                        | $\alpha$ -Ile264                    |
| Hydrophobic residues: 89%             |                  |             |                             |                                     |
| Conservation of specific residue: 44% |                  |             |                             |                                     |
| Conservation of residue type*: 100%   |                  |             |                             |                                     |

\* Residues are categorized as hydrophilic or hydrophobic



**Table S7.** Close Contacts and Residue Conservation for Av1-Xe2 (Protein Surface)

|                                       | <b>Residue</b>   | <b>Atom</b> | <b>Distance from Xe (Å)</b> | <b>Corresponding residue in Cp1</b> |
|---------------------------------------|------------------|-------------|-----------------------------|-------------------------------------|
| 1                                     | $\alpha$ -His196 | CD2         | 5.20                        | $\alpha$ -His185                    |
| 2                                     | $\alpha$ -Asn199 | O           | 3.98                        | $\alpha$ -Asn188                    |
| 3                                     | $\alpha$ -Asp200 | OD1         | 3.08                        | $\alpha$ -Asn189                    |
| 4                                     | $\alpha$ -Arg203 | NE          | 4.17                        | $\alpha$ -Met192                    |
| 5                                     | $\alpha$ -Tyr281 | O           | 3.67                        | $\alpha$ -Tyr266                    |
| 6                                     | $\alpha$ -Ile282 | CD1         | 3.87                        | $\alpha$ -Ile267                    |
| 7                                     | $\alpha$ -His285 | CB          | 4.18                        | $\alpha$ -Met270                    |
| Hydrophobic residues: 29%             |                  |             |                             |                                     |
| Conservation of specific residue: 57% |                  |             |                             |                                     |
| Conservation of residue type*: 71%    |                  |             |                             |                                     |

\* Residues are categorized as hydrophilic or hydrophobic

**Table S8.** Close Contacts and Residue Conservation for Av1-Xe3 (Protein Surface)

|                                                                                                          | <b>Residue</b>  | <b>Atom</b> | <b>Distance from Xe (Å)</b> | <b>Corresponding residue in Cp1</b> |
|----------------------------------------------------------------------------------------------------------|-----------------|-------------|-----------------------------|-------------------------------------|
| 1                                                                                                        | $\beta$ -Tyr233 | OH          | 5.24                        | $\beta$ -Gly180                     |
| 2                                                                                                        | $\beta$ -Arg468 | O           | 5.61                        | $\beta$ -Arg408                     |
| 3                                                                                                        | $\beta$ -Ile469 | CD1         | 4.36                        | $\beta$ -Phe409                     |
| 4                                                                                                        | $\beta$ -Ser482 | CB          | 4.50                        | $\beta$ -Asn422                     |
| 5                                                                                                        | $\beta$ -Thr483 | C           | 4.81                        | $\beta$ -Pro423                     |
| 6                                                                                                        | $\beta$ -Thr484 | O           | 3.92                        | $\beta$ -Lys424                     |
| 7                                                                                                        | $\beta$ -Gly489 | O           | 5.10                        | $\beta$ -Gly429                     |
| 8                                                                                                        | $\beta$ -Gln492 | CB          | 4.19                        | $\beta$ -Arg432                     |
| 9                                                                                                        | $\beta$ -Ile493 | CG1         | 3.83                        | $\beta$ -Leu433                     |
| 10                                                                                                       | $\beta$ -Thr496 | OG1         | 4.44                        | $\beta$ -Glu436                     |
| Hydrophobic residues: 40%<br>Conservation of specific residue: 20%<br>Conservation of residue type*: 90% |                 |             |                             |                                     |

\* Residues are categorized as hydrophilic or hydrophobic

**Table S9.** Close Contacts and Residue Conservation for Cp1-Xe1 (Protein Surface)

|                                       | <b>Residue</b>   | <b>Atom</b> | <b>Distance from Xe (Å)</b> | <b>Corresponding residue in Av1</b> |
|---------------------------------------|------------------|-------------|-----------------------------|-------------------------------------|
| 1                                     | $\alpha$ -Asp107 | OD2         | 5.84                        | $\alpha$ -Asp117                    |
| 2                                     | $\alpha$ -Lys120 | CE          | 5.99                        | $\alpha$ -Lys130                    |
| 3                                     | $\alpha$ -Glu127 | OE1         | 5.40                        | $\alpha$ -Glu137                    |
| 4                                     | $\beta$ -Arg12   | O           | 3.81                        | $\beta$ -Arg59                      |
| 5                                     | $\beta$ -Lys13   | C           | 4.11                        | $\beta$ -Glu60                      |
| 6                                     | $\beta$ -Ala14   | N           | 3.93                        | $\beta$ -Ala61                      |
| 7                                     | $\beta$ -Leu15   | O           | 3.51                        | $\beta$ -Leu62                      |
| 8                                     | $\beta$ -Arg16   | NH1         | 3.73                        | $\beta$ -Thr63                      |
| 9                                     | $\beta$ -Ile17   | N           | 5.81                        | $\beta$ -Val64                      |
| 10                                    | $\beta$ -Glu371  | O           | 5.84                        | $\beta$ -Gly424                     |
| 11                                    | $\beta$ -Asp373  | OD2         | 5.09                        | $\beta$ -Asp426                     |
| Hydrophobic residues: 27%             |                  |             |                             |                                     |
| Conservation of specific residue: 64% |                  |             |                             |                                     |
| Conservation of residue type*: 91%    |                  |             |                             |                                     |

\* Residues are categorized as hydrophilic or hydrophobic

**Table S10.** Close Contacts and Residue Conservation for Cp1-Xe2 (Protein Surface)

|                                                                                                          | <b>Residue</b>   | <b>Atom</b> | <b>Distance from Xe (Å)</b> | <b>Corresponding residue in Av1</b> |
|----------------------------------------------------------------------------------------------------------|------------------|-------------|-----------------------------|-------------------------------------|
| 1                                                                                                        | $\alpha$ -Asp254 | O           | 3.57                        | $\alpha$ -Lys269                    |
| 2                                                                                                        | $\alpha$ -Leu255 | CB          | 4.30                        | $\alpha$ -Leu270                    |
| 3                                                                                                        | $\alpha$ -Pro278 | CG          | 5.41                        | $\alpha$ -Pro293                    |
| 4                                                                                                        | $\alpha$ -Cys300 | O           | 3.38                        | $\alpha$ -Lys315                    |
| 5                                                                                                        | $\alpha$ -Phe301 | CZ          | 3.84                        | $\alpha$ -Phe316                    |
| 6                                                                                                        | $\alpha$ -Val406 | CG1         | 3.90                        | n/a                                 |
| 7                                                                                                        | $\alpha$ -Ile407 | CD1         | 4.18                        | n/a                                 |
| Hydrophobic residues: 71%<br>Conservation of specific residue: 43%<br>Conservation of residue type*: 80% |                  |             |                             |                                     |

\* Residues are categorized as hydrophilic or hydrophobic

**Table S11.** Close Contacts and Residue Conservation for Cp1-Xe3 (Protein Interior)

|                                                                                                          | <b>Residue</b>   | <b>Atom</b> | <b>Distance from Xe (Å)</b> | <b>Corresponding residue in Av1</b> |
|----------------------------------------------------------------------------------------------------------|------------------|-------------|-----------------------------|-------------------------------------|
| 1                                                                                                        | $\alpha$ -Phe460 | CE1         | 4.63                        | $\alpha$ -Gly422                    |
| 2                                                                                                        | $\alpha$ -Lys477 | CG          | 3.95                        | $\alpha$ -Arg439                    |
| 3                                                                                                        | $\alpha$ -Leu479 | CD2         | 5.55                        | $\alpha$ -Met441                    |
| 4                                                                                                        | $\alpha$ -Asp483 | OD2         | 5.94                        | $\alpha$ -Asp445                    |
| 5                                                                                                        | $\alpha$ -Tyr488 | OH          | 3.61                        | $\alpha$ -Tyr450                    |
| 6                                                                                                        | $\alpha$ -Asn496 | O           | 5.39                        | $\alpha$ -Ile458                    |
| 7                                                                                                        | $\alpha$ -Phe497 | CD1         | 3.29                        | $\alpha$ -Phe459                    |
| 8                                                                                                        | $\alpha$ -Gly498 | N           | 5.37                        | $\alpha$ -Ala460                    |
| 9                                                                                                        | $\alpha$ -Glu500 | CB          | 3.83                        | $\alpha$ -Asp462                    |
| 10                                                                                                       | $\alpha$ -Leu501 | N           | 3.71                        | $\alpha$ -Met463                    |
| Hydrophobic residues: 60%<br>Conservation of specific residue: 30%<br>Conservation of residue type*: 90% |                  |             |                             |                                     |

\* Residues are categorized as hydrophilic or hydrophobic

**Table S12.** Close Contacts for Cp1-PRL

|                                       | <b>Residue</b> | <b>Atom</b> | <b>Distance from ligand (Å)</b> | <b>Corresponding residue in Av1</b> |
|---------------------------------------|----------------|-------------|---------------------------------|-------------------------------------|
| 1                                     | β-Tyr30        | CZ          | 3.7                             | β-Leu77                             |
| 2                                     | β-His59        | NE2         | 3.7                             | β-His106                            |
| 3                                     | β-Phe60        | CZ          | 3.8                             | β-Phe107                            |
| 4                                     | β-Phe178       | CE2         | 3.4                             | β-Phe230                            |
| 5                                     | β-Val179       | CA          | 3.5                             | β-Glu231                            |
| 6                                     | β-Gly180       | C3          | 3.4                             | β-Thr232                            |
| 7                                     | β-Asp183       | OD2         | 4.1                             | β-Asn236                            |
| 8                                     | β-Glu323       | OE2         | 3.0                             | β-Phe375                            |
| 9                                     | β-Gly410       | O           | 3.8                             | β-Gly470                            |
| 10                                    | β-Phe411       | C1          | 3.8                             | β-Phe471                            |
| 11                                    | β-Lys424       | NZ          | 2.7                             | β-Thr424                            |
| Conservation of specific residue: 46% |                |             |                                 |                                     |
| Conservation of residue type*: 73%    |                |             |                                 |                                     |

\* Residues are categorized as hydrophilic or hydrophobic

**Table S13.** Close Contacts for Av1-IMD

|                                       | <b>Residue</b>   | <b>Atom</b> | <b>Distance from ligand (Å)</b> | <b>Corresponding residue in Cp1</b> |
|---------------------------------------|------------------|-------------|---------------------------------|-------------------------------------|
| 1                                     | $\alpha$ -Ala94  | O           | 4.1                             | $\alpha$ -Gly85                     |
| 2                                     | $\alpha$ -Gly95  | N           | 5.2                             | $\alpha$ -Gly86                     |
| 3                                     | $\alpha$ -Arg96  | O           | 3.1                             | $\alpha$ -Arg87                     |
| 4                                     | $\alpha$ -Arg97  | CA          | 3.9                             | $\alpha$ -Arg88                     |
| 5                                     | $\alpha$ -Asn98  | ND2         | 3.9                             | $\alpha$ -Phe89                     |
| 6                                     | $\alpha$ -Tyr99  | CE1         | 3.3                             | $\alpha$ -Lys90                     |
| 7                                     | $\alpha$ -Tyr100 | CE2         | 4.2                             | $\alpha$ -Pro91                     |
| 8                                     | $\alpha$ -Val110 | CG1         | 4.2                             | $\alpha$ -Asn102                    |
| 9                                     | $\alpha$ -Thr111 | CG2         | 3.9                             | $\alpha$ -Glu103                    |
| 10                                    | $\beta'$ -Asp516 | O           | 5.7                             | $\beta'$ -Glu451                    |
| 11                                    | $\beta'$ -Tyr517 | C5          | 4.1                             | $\beta'$ -Glu452                    |
| 12                                    | $\beta'$ -Asn518 | N           | 6.0                             | $\beta'$ -Asp453                    |
| 13                                    | $\beta'$ -His519 | C           | 5.4                             | $\beta'$ -Phe454                    |
| 14                                    | $\beta'$ -Asp520 | OD1         | 3.7                             | $\beta'$ -Glu455                    |
| 15                                    | $\beta'$ -Leu521 | N           | 4.9                             | $\beta'$ -Val456                    |
| Conservation of specific residue: 20% |                  |             |                                 |                                     |
| Conservation of residue type*: 60%    |                  |             |                                 |                                     |

\* Residues are categorized as hydrophilic or hydrophobic

**Table S14.** Residues Lining the AI Pathway in Av1 and Cp1

| <b>AI pathway in Av1</b>              | <b>AI pathway in Cp1</b> |
|---------------------------------------|--------------------------|
| $\alpha$ -Val70                       | $\alpha$ -Val59          |
| $\alpha$ -Val71                       | $\alpha$ -Val60          |
| $\alpha$ -Trp72                       | $\alpha$ -Met61          |
| $\alpha$ -Ile75                       | $\alpha$ -Ile64          |
| $\alpha$ -His195                      | $\alpha$ -His184         |
| $\alpha$ -His196                      | $\alpha$ -His185         |
| $\alpha$ -Asn199                      | $\alpha$ -Asn188         |
| $\alpha$ -Asp200                      | $\alpha$ -Asn189         |
| $\alpha$ -Val202                      | $\alpha$ -Val191         |
| $\alpha$ -Arg203                      | $\alpha$ -Met192         |
| $\alpha$ -Tyr229                      | $\alpha$ -Tyr214         |
| $\alpha$ -Trp253                      | $\alpha$ -Leu238         |
| $\alpha$ -Ser254                      | $\alpha$ -Thr239         |
| $\alpha$ -Cys275                      | $\alpha$ -Cys260         |
| $\alpha$ -Ser278                      | $\alpha$ -Ser263         |
| $\alpha$ -Met279                      | $\alpha$ -Ile264         |
| $\alpha$ -Tyr281                      | $\alpha$ -Tyr266         |
| $\alpha$ -Ile282                      | $\alpha$ -Ile267         |
| Conservation of specific residue: 67% |                          |
| Conservation of residue type*: 94%    |                          |

\* Residues are categorized as hydrophilic or hydrophobic



**Table S15.** Residues Lining the AII Pathway in Cp1 and Av1

| <b>AII pathway in Av1</b>             | <b>AII pathway in Cp1</b> |
|---------------------------------------|---------------------------|
| $\alpha$ -Ile59                       | $\alpha$ -Ala48           |
| $\alpha$ -Tyr354                      | $\alpha$ -Tyr340          |
| $\alpha$ -Ile355                      | $\alpha$ -Val341          |
| $\alpha$ -Glu380                      | $\alpha$ -Glu366          |
| $\alpha$ -Gly422                      | $\alpha$ -Phe460          |
| $\alpha$ -Ser423                      | $\alpha$ -Ala461          |
| $\alpha$ -Gly424                      | $\alpha$ -Gly462          |
| $\alpha$ -Lys426                      | $\alpha$ -Lys464          |
| $\alpha$ -Glu427                      | $\alpha$ -Glu465          |
| $\alpha$ -Arg439                      | $\alpha$ -Lys477          |
| $\alpha$ -Glu440                      | $\alpha$ -Gln478          |
| $\alpha$ -Met441                      | $\alpha$ -Leu479          |
| $\alpha$ -His442                      | $\alpha$ -His480          |
| $\alpha$ -Asp445                      | $\alpha$ -Asp483          |
| $\alpha$ -Ser447                      | $\alpha$ -Asn485          |
| $\alpha$ -Tyr450                      | $\alpha$ -Tyr488          |
| $\alpha$ -Phe459                      | $\alpha$ -Phe497          |
| $\alpha$ -Asp462                      | $\alpha$ -Glu500          |
| $\alpha$ -Met463                      | $\alpha$ -Leu501          |
| $\beta'$ -Thr360                      | $\beta'$ -Gln308          |
| Conservation of specific residue: 45% |                           |
| Conservation of residue type*: 90%    |                           |

\* Residues are categorized as hydrophilic or hydrophobic

**Table S16.** Residues Lining the BI Pathway in Cp1 and Av1

| <b>BI pathway in Av1</b>              | <b>BI pathway in Cp1</b> |
|---------------------------------------|--------------------------|
| $\alpha$ -Ala65                       | $\alpha$ -Ala54          |
| $\alpha$ -Gly66                       | $\alpha$ -Gly55          |
| $\alpha$ -Gly69                       | $\alpha$ -Gly58          |
| $\alpha$ -Val70                       | $\alpha$ -Val59          |
| $\alpha$ -Gln90                       | $\alpha$ -Phe79          |
| $\alpha$ -Tyr91                       | $\alpha$ -Tyr80          |
| $\alpha$ -Ser92                       | $\alpha$ -Thr81          |
| $\alpha$ -Arg93                       | $\alpha$ -Trp82          |
| $\alpha$ -Ala94                       | $\alpha$ -Gly83          |
| $\alpha$ -Gly95                       | $\alpha$ -Gly84          |
| $\alpha$ -Arg96                       | $\alpha$ -Arg85          |
| $\alpha$ -Gln191                      | $\alpha$ -Gln180         |
| $\alpha$ -His195                      | $\alpha$ -His184         |
| $\beta$ -Ala67                        | $\beta$ -Ala20           |
| $\beta$ -Lys68                        | $\beta$ -Lys21           |
| $\beta$ -Ala69                        | $\beta$ -Thr22           |
| $\beta$ -Leu67                        | $\beta$ -Tyr30           |
| $\beta$ -Tyr102                       | $\beta$ -Val55           |
| $\beta$ -Arg105                       | $\beta$ -Arg58           |
| $\beta$ -His106                       | $\beta$ -His59           |
| $\beta$ -Phe107                       | $\beta$ -Phe60           |
| $\beta$ -His193                       | $\beta$ -His146          |
| $\beta$ -Phe230                       | $\beta$ -Phe178          |
| $\beta$ -Thr232                       | $\beta$ -Val179          |
| $\beta$ -Gly368                       | $\beta$ -Gly319          |
| $\beta$ -Asp369                       | $\beta$ -Asp320          |
| $\beta$ -Phe372                       | $\beta$ -Glu323          |
| $\beta$ -Asn445                       | $\beta$ -Asn392          |
| $\beta$ -Tyr447                       | $\beta$ -Tyr394          |
| $\beta$ -Gly470                       | $\beta$ -Gly410          |
| $\beta$ -Phe471                       | $\beta$ -Phe411          |
| $\beta$ -Pro472                       | $\beta$ -Pro412          |
| $\beta$ -Phe474                       | $\beta$ -Met414          |
| $\beta$ -Thr484                       | $\beta$ -Lys424          |
| Conservation of specific residue: 68% |                          |
| Conservation of residue type*: 82%    |                          |

\* Residues are categorized as hydrophilic or hydrophobic

**Table S17.** Residues Lining the CI Pathway in Cp1 and Av1

| <b>CI pathway in Av1</b>              | <b>CI pathway in Cp1</b> |
|---------------------------------------|--------------------------|
| $\alpha$ -Gly61                       | $\alpha$ -Gly50          |
| $\alpha$ -Cys62                       | $\alpha$ -Cys51          |
| $\alpha$ -Tyr64                       | $\alpha$ -Tyr53          |
| $\alpha$ -Ala65                       | $\alpha$ -Ala54          |
| $\alpha$ -Gln90                       | $\alpha$ -Phe79          |
| $\alpha$ -Tyr91                       | $\alpha$ -Tyr80          |
| $\alpha$ -Ser92                       | $\alpha$ -Thr82          |
| $\beta$ -Ala67                        | $\beta$ -Ala20           |
| $\beta$ -Lys68                        | $\beta$ -Lys21           |
| $\beta$ -Ala69                        | $\beta$ -Thr22           |
| $\beta$ -Leu77                        | $\beta$ -Tyr30           |
| $\beta$ -Gly94                        | $\beta$ -Gly47           |
| $\beta$ -Ala97                        | $\beta$ -Ser50           |
| $\beta$ -Tyr98                        | $\beta$ -Tyr51           |
| $\beta$ -Ser100                       | $\beta$ -Thr54           |
| $\beta$ -Tyr102                       | $\beta$ -Val55           |
| $\beta$ -Arg105                       | $\beta$ -Arg58           |
| $\beta$ -His106                       | $\beta$ -His59           |
| $\beta$ -Phe107                       | $\beta$ -Phe60           |
| $\beta$ -His193                       | $\beta$ -His146          |
| $\beta$ -Phe230                       | $\beta$ -Phe178          |
| $\beta$ -Glu231                       | $\beta$ -Val179          |
| $\beta$ -Gly368                       | $\beta$ -Gly319          |
| $\beta$ -Asp369                       | $\beta$ -Asp320          |
| $\beta$ -Phe372                       | $\beta$ -Glu323          |
| $\beta$ -Asn445                       | $\beta$ -Asn392          |
| $\beta$ -Tyr447                       | $\beta$ -Tyr394          |
| $\beta$ -Gly470                       | $\beta$ -Gly410          |
| $\beta$ -Phe471                       | $\beta$ -Phe411          |
| $\beta$ -Pro472                       | $\beta$ -Pro412          |
| $\beta$ -Phe474                       | $\beta$ -Met414          |
| $\beta$ -Thr484                       | $\beta$ -Lys424          |
| Conservation of specific residue: 66% |                          |
| Conservation of residue type*: 81%    |                          |

\* Residues are categorized as hydrophilic or hydrophobic

**Table S18.** Residues Lining the DI Pathway/Interstitial Water Channel in Cp1 and Av1

| <b>DI pathway in Av1</b>              | <b>DI pathway in Cp1</b> |
|---------------------------------------|--------------------------|
| $\alpha$ -Lys68                       | $\alpha$ -Lys57          |
| $\alpha$ -Gly69                       | $\alpha$ -Gly58          |
| $\alpha$ -Gly73                       | $\alpha$ -Gly62          |
| $\alpha$ -Ser92                       | $\alpha$ -Thr81          |
| $\alpha$ -Arg93                       | $\alpha$ -Trp82          |
| $\alpha$ -Arg96                       | $\alpha$ -Arg85          |
| $\alpha$ -Arg97                       | $\alpha$ -Arg86          |
| $\alpha$ -Asn98                       | $\alpha$ -Ser89          |
| $\alpha$ -Tyr99                       | $\alpha$ -Lys90          |
| $\alpha$ -Tyr100                      | $\alpha$ -Pro91          |
| $\alpha$ -Ile101                      | $\alpha$ -Glu92          |
| $\alpha$ -Thr104                      | $\alpha$ -Thr95          |
| $\alpha$ -Val110                      | $\alpha$ -Asn100         |
| $\alpha$ -Thr111                      | $\alpha$ -Glu101         |
| $\alpha$ -Ile231                      | $\alpha$ -Ile216         |
| $\alpha$ -His442                      | $\alpha$ -His480         |
| $\alpha$ -Ser443                      | $\alpha$ -Ser481         |
| $\alpha$ -Tyr446                      | $\alpha$ -Tyr482         |
| $\beta$ -Leu16                        | n/a                      |
| $\beta$ -Lys21                        | n/a                      |
| $\beta$ -Leu24                        | n/a                      |
| $\beta$ -Arg28                        | n/a                      |
| $\beta$ -Tyr98                        | $\beta$ -Tyr50           |
| $\beta$ -Arg105                       | $\beta$ -Arg57           |
| $\beta$ -Phe450                       | $\beta$ -Phe397          |
| $\beta$ -Arg453                       | $\beta$ -Arg400          |
| $\beta'$ -Gln513                      | n/a                      |
| $\beta'$ -Ala514                      | $\beta'$ -Cys449         |
| $\beta'$ -Asp516                      | $\beta'$ -Glu451         |
| $\beta'$ -Tyr517                      | $\beta'$ -Glu452         |
| $\beta'$ -Asn518                      | $\beta'$ -Asp453         |
| $\beta'$ -His519                      | $\beta'$ -Phe454         |
| $\beta'$ -Asp520                      | $\beta'$ -Glu455         |
| $\beta'$ -Leu521                      | $\beta'$ -Val456         |
| $\beta'$ -Val522                      | $\beta'$ -Val457         |
| Conservation of specific residue: 50% |                          |
| Conservation of residue type*: 87%    |                          |

\* Residues are categorized as hydrophilic or hydrophobic

**Table S19.** Residues Lining the IS Pathway in Av1 and Cp1

| <b>IS pathway in Av1</b>              | <b>IS pathway in Cp1</b> |
|---------------------------------------|--------------------------|
| $\alpha$ -Val70                       | $\alpha$ -Val59          |
| $\alpha$ -Val71                       | $\alpha$ -Val60          |
| $\alpha$ -Trp72                       | $\alpha$ -Met61          |
| $\alpha$ -Ile75                       | $\alpha$ -Ile64          |
| $\alpha$ -Met78                       | $\alpha$ -Met67          |
| $\alpha$ -Arg96                       | $\alpha$ -Arg85          |
| $\alpha$ -Val179                      | $\alpha$ -His168         |
| $\alpha$ -His195                      | $\alpha$ -His184         |
| $\alpha$ -Val202                      | $\alpha$ -Val191         |
| $\alpha$ -Trp205                      | $\alpha$ -Glu194         |
| $\alpha$ -Lys209                      | $\alpha$ -Lys198         |
| $\alpha$ -Tyr229                      | $\alpha$ -Tyr214         |
| $\alpha$ -Trp253                      | $\alpha$ -Leu238         |
| $\alpha$ -Ile262                      | $\alpha$ -Val247         |
| $\alpha$ -Glu263                      | $\alpha$ -Gln248         |
| $\alpha$ -Met279                      | $\alpha$ -Ile264         |
| Conservation of specific residue: 56% |                          |
| Conservation of residue type*: 94%    |                          |

\* Residues are categorized as hydrophilic or hydrophobic

**Table S20.** Residues Lining Dance's NH<sub>3</sub> Egress Pathway in Av1 and Cp1<sup>6</sup>

| <b>NH<sub>3</sub> egress pathway in Av1</b> | <b>NH<sub>3</sub> egress pathway in Cp1</b> |
|---------------------------------------------|---------------------------------------------|
| $\alpha$ -Gln53                             | $\alpha$ -Val42                             |
| $\alpha$ -Met57                             | $\alpha$ -Ile46                             |
| $\alpha$ -Thr58                             | $\alpha$ -Thr47                             |
| $\alpha$ -Ile59                             | $\alpha$ -Ala48                             |
| $\alpha$ -Arg60                             | $\alpha$ -Arg49                             |
| $\alpha$ -Ala65                             | $\alpha$ -Ala54                             |
| $\alpha$ -Gln191                            | $\alpha$ -Gln180                            |
| $\alpha$ -Glu380                            | $\alpha$ -Glu366                            |
| $\alpha$ -Asp403                            | $\alpha$ -Asp441                            |
| $\alpha$ -Lys426                            | $\alpha$ -Lys464                            |
| $\beta$ -Gln93                              | $\beta$ -Gln46                              |
| $\beta$ -Gly94                              | $\beta$ -Gly47                              |
| $\beta$ -Ser115                             | $\beta$ -Thr68                              |
| $\beta$ -Ser117                             | $\beta$ -Ser70                              |
| Conservation of specific residue: 71%       |                                             |
| Conservation of residue type*: 93%          |                                             |

\* Residues are categorized as hydrophilic or hydrophobic

**Table S21.** Residues Lining Smith's Molecular Dynamics Pathway in Cp1 and Av1<sup>7</sup>

| <b>MD pathway in Av1</b>              | <b>MD pathway in Cp1</b> |
|---------------------------------------|--------------------------|
| $\alpha$ -Asn49                       | $\alpha$ -Asn38          |
| $\alpha$ -Gly66                       | $\alpha$ -Gly55          |
| $\alpha$ -Val70                       | $\alpha$ -Val59          |
| $\alpha$ -Ser190                      | $\alpha$ -Ser179         |
| $\alpha$ -Gln191                      | $\alpha$ -Gln180         |
| $\alpha$ -Ser192                      | $\alpha$ -Ser181         |
| $\alpha$ -Leu193                      | $\alpha$ -Ala182         |
| $\alpha$ -His195                      | $\alpha$ -His184         |
| $\alpha$ -His196                      | $\alpha$ -His185         |
| $\alpha$ -Asn199                      | $\alpha$ -Asn188         |
| $\alpha$ -Arg277                      | $\alpha$ -Arg262         |
| $\alpha$ -Ser278                      | $\alpha$ -Ser263         |
| $\alpha$ -Met279                      | $\alpha$ -Ile264         |
| $\alpha$ -Asn280                      | $\alpha$ -Asn265         |
| $\alpha$ -Tyr281                      | $\alpha$ -Tyr268         |
| $\alpha$ -Gly357                      | $\alpha$ -Gly343         |
| $\alpha$ -Phe381                      | $\alpha$ -Phe367         |
| $\alpha$ -Ala382                      | $\alpha$ -Ala368         |
| $\alpha$ -His383                      | $\alpha$ -His369         |
| Conservation of specific residue: 90% |                          |
| Conservation of residue type*: 100%   |                          |

\* Residues are categorized as hydrophilic or hydrophobic

Av1-Xe1 and -Xe2

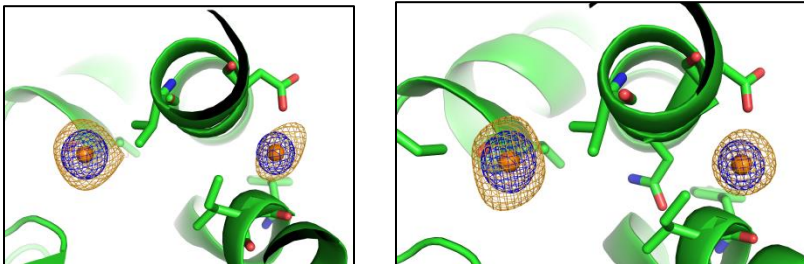

Av1-Xe3

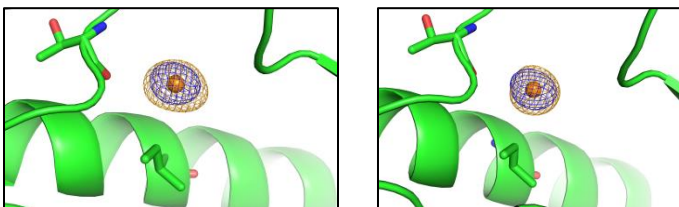

Cp1-Xe1

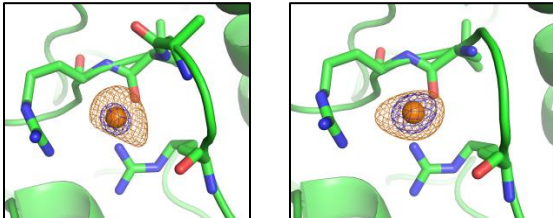

Cp1-Xe2

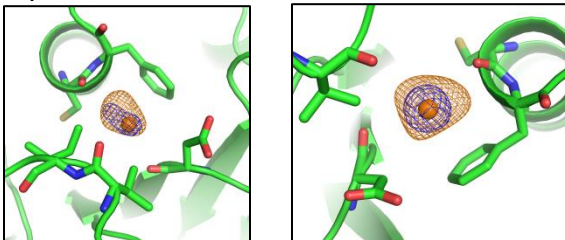

Cp1-Xe3

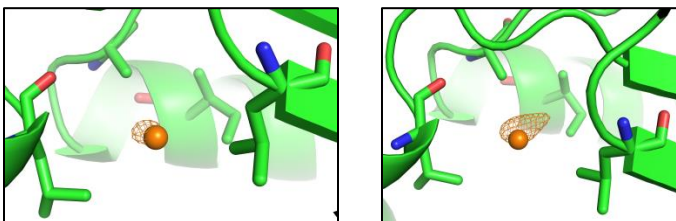

**Figure S1.** Electron density maps (blue mesh) and anomalous difference maps (orange mesh) for each Xe binding site, including noncrystallographically-related pairs, and their surrounding environment. Both maps are contoured to  $3\sigma$ . Residues with at least one atom that is  $4\text{ \AA}$  or closer to the Xe atom are shown in sticks. Note that the electron density for Cp1-Xe3 is not visible above the orange Xe atom at  $3\sigma$  due to low site occupancy.



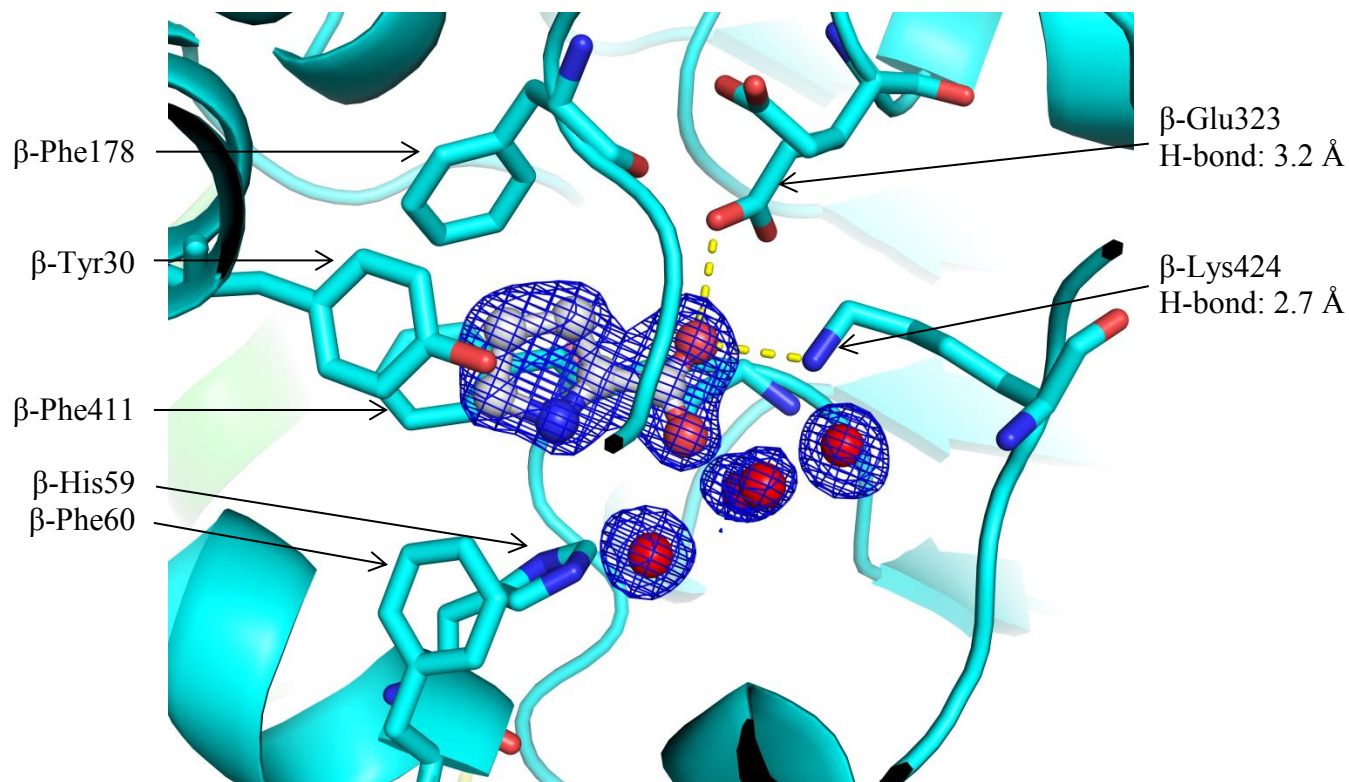

**Figure S2.** PRL binding site with the neighboring residues in sticks. The PRL molecule is shown with spheres and sticks and is colored by element. The electron density of the PRL and nearby water molecules are shown in blue mesh contoured to  $2.0 \sigma$ . Distances between the closest N atom of PRL and the N of  $\beta$ -Lys424 and OE2 of  $\beta$ -Glu323 are given. Note the well-defined electron density of the water molecules. See Experimental section of the main text for further discussion.

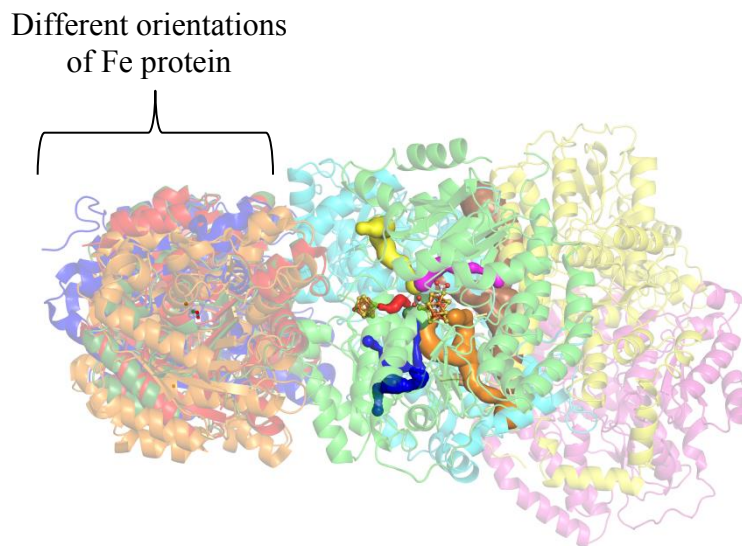

**Figure S3.** Overlays of four different Av1-Av2 complexes: ADP·AlF<sub>4</sub><sup>-</sup> stabilized Av1-Av2 (PDB ID 1M34, red cartoon), nucleotide-free Av1-Av2 (PDB ID 2AFH, blue cartoon), MgAMPPCP-bound Av1-Av2 (PDB ID 2AFK, forest green cartoon), and MgADP-bound Av1-Av2 (PDB ID 2AFI, orange cartoon). The docking of the Fe protein does not block any of the proposed substrate pathways<sup>8, 9</sup>.

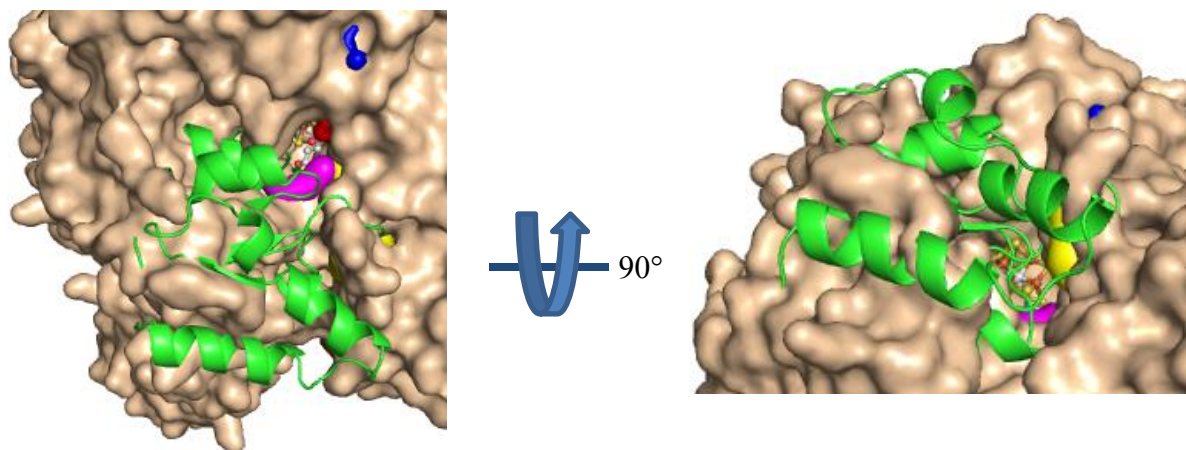

**Figure S4.** Overlay of the molecular surface of the FeMo-cofactor-deficient Av1 protein (wheat surface, PDB ID 1L5H)<sup>10</sup>. The channel used for transportation of the FeMo-cofactor is visible as the hole in the wheat surface that connects the protein surface to the location of the FeMo-cofactor in the mature protein. The green protein backbone is the  $\alpha$ -subunit of the Av1-Xe structure, and the other colored surfaces belong to the substrate access pathways. Three are visible: the AI (blue surface), AII (magenta surface), and NH<sub>3</sub> egress (yellow surface) pathways. Part of the AII pathway overlaps with the FeMo-cofactor insertion pathway.

## References

1. Spatzal, T., Aksoyoglu, M., Zhang, L., Andrade, S. L., Schleicher, E., Weber, S., Rees, D. C., and Einsle, O. (2011) Evidence for interstitial carbon in nitrogenase FeMo-cofactor, *Science* 334, 940.
2. Spatzal, T., Perez, K. A., Einsle, O., Howard, J. B., and Rees, D. C. (2014) Ligand binding to the FeMo-cofactor: Structures of CO-bound and reactivated nitrogenase, *Science* 345, 1620-1623.
3. Zhang, L.-M., Morrison, C. N., Kaiser, J. T., and Rees, D. C. Nitrogenase MoFe-protein from *Clostridium pasteurianum* at 1.08 Å resolution: Comparison to the *Azotobacter vinelandii* MoFe-protein., *Acta Crystallogr., Sect. D: Biol. Crystallogr.* In press, doi: 10.1107/S1399004714025243.
4. Mayer, S. M., Lawson, D. M., Gormal, C. A., Roe, S. M., and Smith, B. E. (1999) New insights into structure-function relationships in nitrogenase: A 1.6 Å resolution X-ray crystallographic study of *Klebsiella pneumoniae* MoFe-protein, *J. Mol. Biol.* 292, 871-891.
5. Barney, B. M., Yurth, M. G., Dos Santos, P. C., Dean, D. R., and Seefeldt, L. C. (2009) A substrate channel in the nitrogenase MoFe protein, *J. Biol. Inorg. Chem.* 14, 1015-1022.
6. Dance, I. (2013) A molecular pathway for the egress of ammonia produced by nitrogenase, *Sci. Rep.* 3, 3237.
7. Smith, D. M. A., Danyal, K., Raugei, S., and Seefeldt, L. C. (2014) A substrate channel in nitrogenase revealed by a molecular dynamics approach, *Biochemistry* 53, 2278-2285.
8. Schmid, B., Einsle, O., Chiu, H.-J., Willing, A., Yoshida, M., Howard, J. B., and Rees, D. C. (2002) Biochemical and structural characterization of the cross-linked complex of nitrogenase: Comparison to the ADP-AlF<sub>4</sub><sup>-</sup>-stabilized structure, *Biochemistry* 41, 15557-15565.
9. Tezcan, F. A., Kaiser, J. T., Mustafi, D., Walton, M. Y., Howard, J. B., and Rees, D. C. (2005) Nitrogenase complexes: multiple docking sites for a nucleotide switch protein, *Science* 309, 1377-1380.
10. Schmid, B., Ribbe, M. W., Einsle, O., Yoshida, M., Thomas, L. M., Dean, D. R., Rees, D. C., and Burgess, B. K. (2002) Structure of a cofactor-deficient nitrogenase MoFe protein, *Science* 296, 352-356.
